# Supplementary material for: Interactions of ubiquitin and CHMP5 with the V domain of HD-PTP reveals role for regulation of Vps4 ATPase
Source: PubMed Central journal article supplement — Mol Biol Cell. 2021 Dec 1;32(22):ar42. doi: 10.1091/mbc.E21-04-0219 (PMC8694081; doi:10.1091/mbc.e21-04-0219), 2021-12-01

# Supplemental Materials

*Molecular Biology of the Cell*

Pashkova et al.

### Supplemental Figure 1. PRE effects on $^{15}\text{N}$ Ubiquitin.

Top shows portion of HSQC of  $30\mu\text{M}$   $^{15}\text{N}$  Ub alone or in the presence  $30\mu\text{M}$  VHDPTP spin-labelled at position 368 under oxidizing conditions or reduced in the presence of  $2\text{mM}$  ascorbate. The backbone amide for L8 has a low peak height in the presence of spin-label that is partially restored in the presence of ascorbate. Binding of reduced  $\text{V}^{\text{HDPTP}}$  also reduces peak heights, which can also be observed in the slice view below. The extent of binding is reflected in decrease peak height in the presence of ascorbate ( $\Delta 1$ ) and the PRE effect is reflected in the difference in peak height in the presence of  $\text{V}^{\text{HDPTP}}$  under oxidized and reduced conditions ( $\Delta 2$ ).

### Supplemental Figure 2. DEEPN Yeast 2-Hybrid analysis of WT and $\Delta\text{Ub}$ $\text{V}^{\text{HDPTP}}$ .

- A. Abundance of reads for each potential interacting 'prey' gene in rank order for diploids carrying the Y2H pan-mouse cDNA library grown under permissive (His+) non-Y2H-selective conditions that contain the WT  $\text{V}^{\text{HDPTP}}$  as prey (x axis) vs the corresponding abundance of reads for those same genes for the population carrying the  $\Delta\text{Ub}$   $\text{V}^{\text{HDPTP}}$  (Y-axis). These data demonstrate the variance in distribution of library plasmids between the two populations that carry different  $\text{V}^{\text{HDPTP}}$  baits with an overall dispersion of 0.2.
- B. Summary of in-frame open-reading frame fragments that enriched with high confidence (blue) when selected for interaction with WT or  $\Delta\text{Ub}$   $\text{V}^{\text{HDPTP}}$ .
- C. Data on each Y2H interactor in B. Shown is a plot of the nucleotide positions for each indicated cDNA sequence with the start and stop codon indicated. The left Y axis shows the read-depth for a 20 bp window along the cDNA sequence. The right Y axis shows the position and number of reads that bridge the 3' end of the Gal4-DNA binding domain and the 5' end of the interacting gene in blue. All fusion points were determined to be in-frame with the Gal4-DNA binding domain. Paired summary sequence data is shown for WT and  $\Delta\text{Ub}$   $\text{V}^{\text{HDPTP}}$  on the right and left, respectively.

### Supplemental Figure 3. HSQC of $^{15}\text{N}$ -labelled Vps4 MIT domain bound to V domains.

HSQC spectra of  $35\mu\text{M}$   $^{15}\text{N}$ -MIT domain from yeast Vps4 in the absence (green) and presence (red) of  $\text{V}^{\text{Bro1}}$ ,  $\text{V}^{\text{HDPTP}}$ , and  $\text{V}^{\text{Rim20}}$  at the indicated ratios under the conditions described in Figure 8A

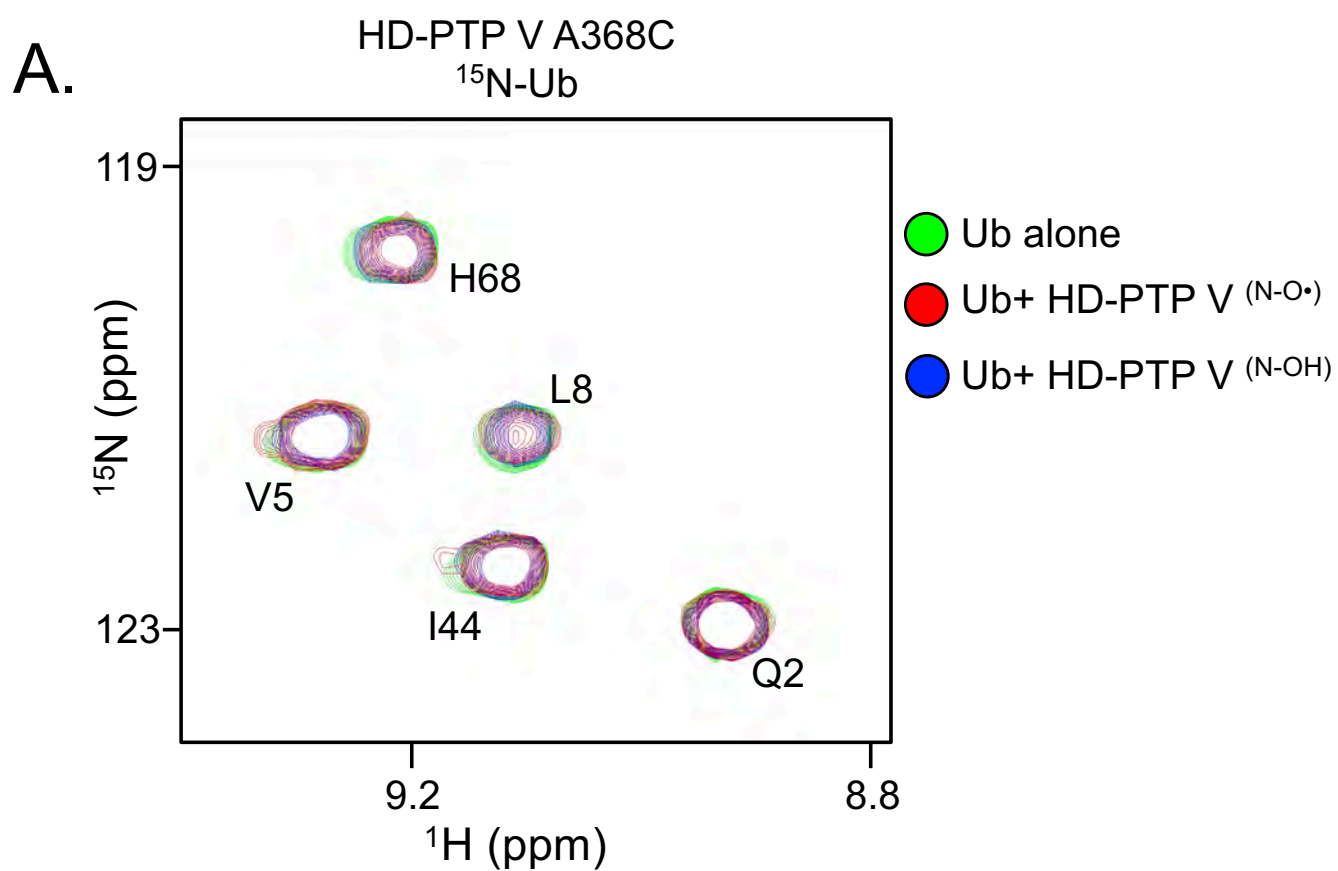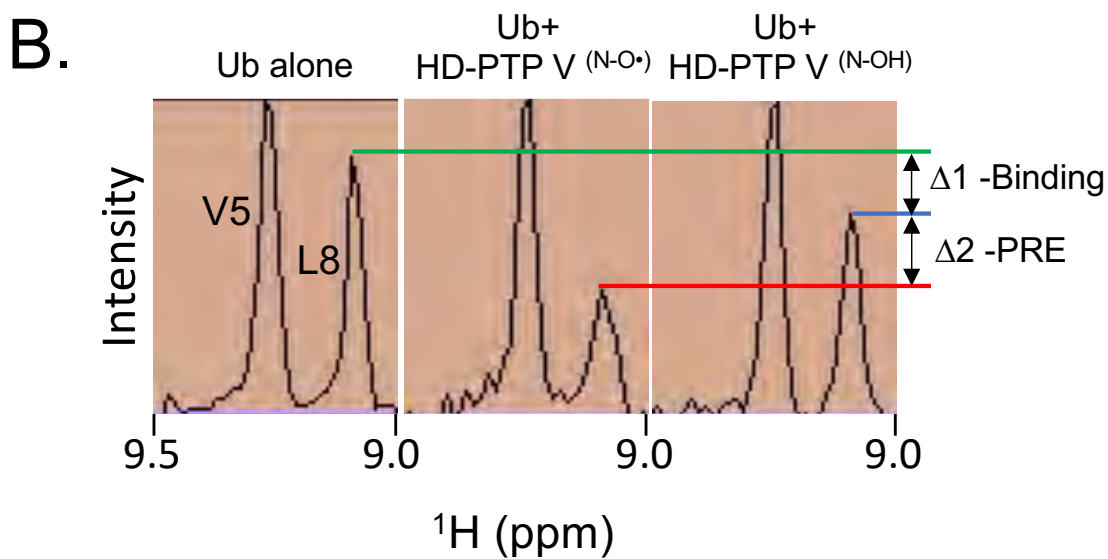

A.

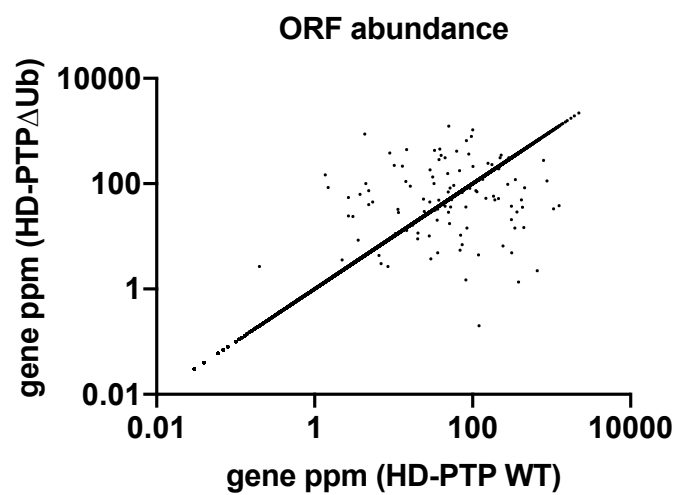

B.

|               | (WT) | ( $\Delta$ Ub) |
|---------------|------|----------------|
| 4930505A04Rik |      |                |
| 6820408C15Rik |      |                |
| AK129341      |      |                |
| Alms1         |      |                |
| Angel2        |      |                |
| Ankef1        |      |                |
| Arid1a        |      |                |
| Armc2         |      |                |
| Ash2l         |      |                |
| Atf7ip2       |      |                |
| Atp1b3        |      |                |
| Bpifa3        |      |                |
| Bsg           |      |                |
| Cacybp        |      |                |
| Ccdc146       |      |                |
| Ccdc173       |      |                |
| Ccdc181       |      |                |
| Ccdc79        |      |                |
| Chmp5         |      |                |
| Cinp          |      |                |
| Clca1         |      |                |
| Commd3        |      |                |
| Cspp1         |      |                |
| Fcho2         |      |                |
| Gpsm2         |      |                |
| Hpcal1        |      |                |
| Ift81         |      |                |
| Ikzf5         |      |                |
| Ints7         |      |                |
| Lancl1        |      |                |
| Mien1         |      |                |
| Ndufaf1       |      |                |
| Nufip1        |      |                |
| Odf2l         |      |                |
| Ola1          |      |                |
| Parp2         |      |                |
| Parpbbp       |      |                |
| Pibf1         |      |                |
| Polr1d        |      |                |
| Prmt7         |      |                |
| Qser1         |      |                |
| Rbm19         |      |                |
| Rpl12         |      |                |
| Sdr39u1       |      |                |
| Sgcb          |      |                |
| Spag17        |      |                |
| Spata1        |      |                |
| Thrap3        |      |                |
| Toporsl       |      |                |
| Tubgcp5       |      |                |
| Tulp4         |      |                |

C-1

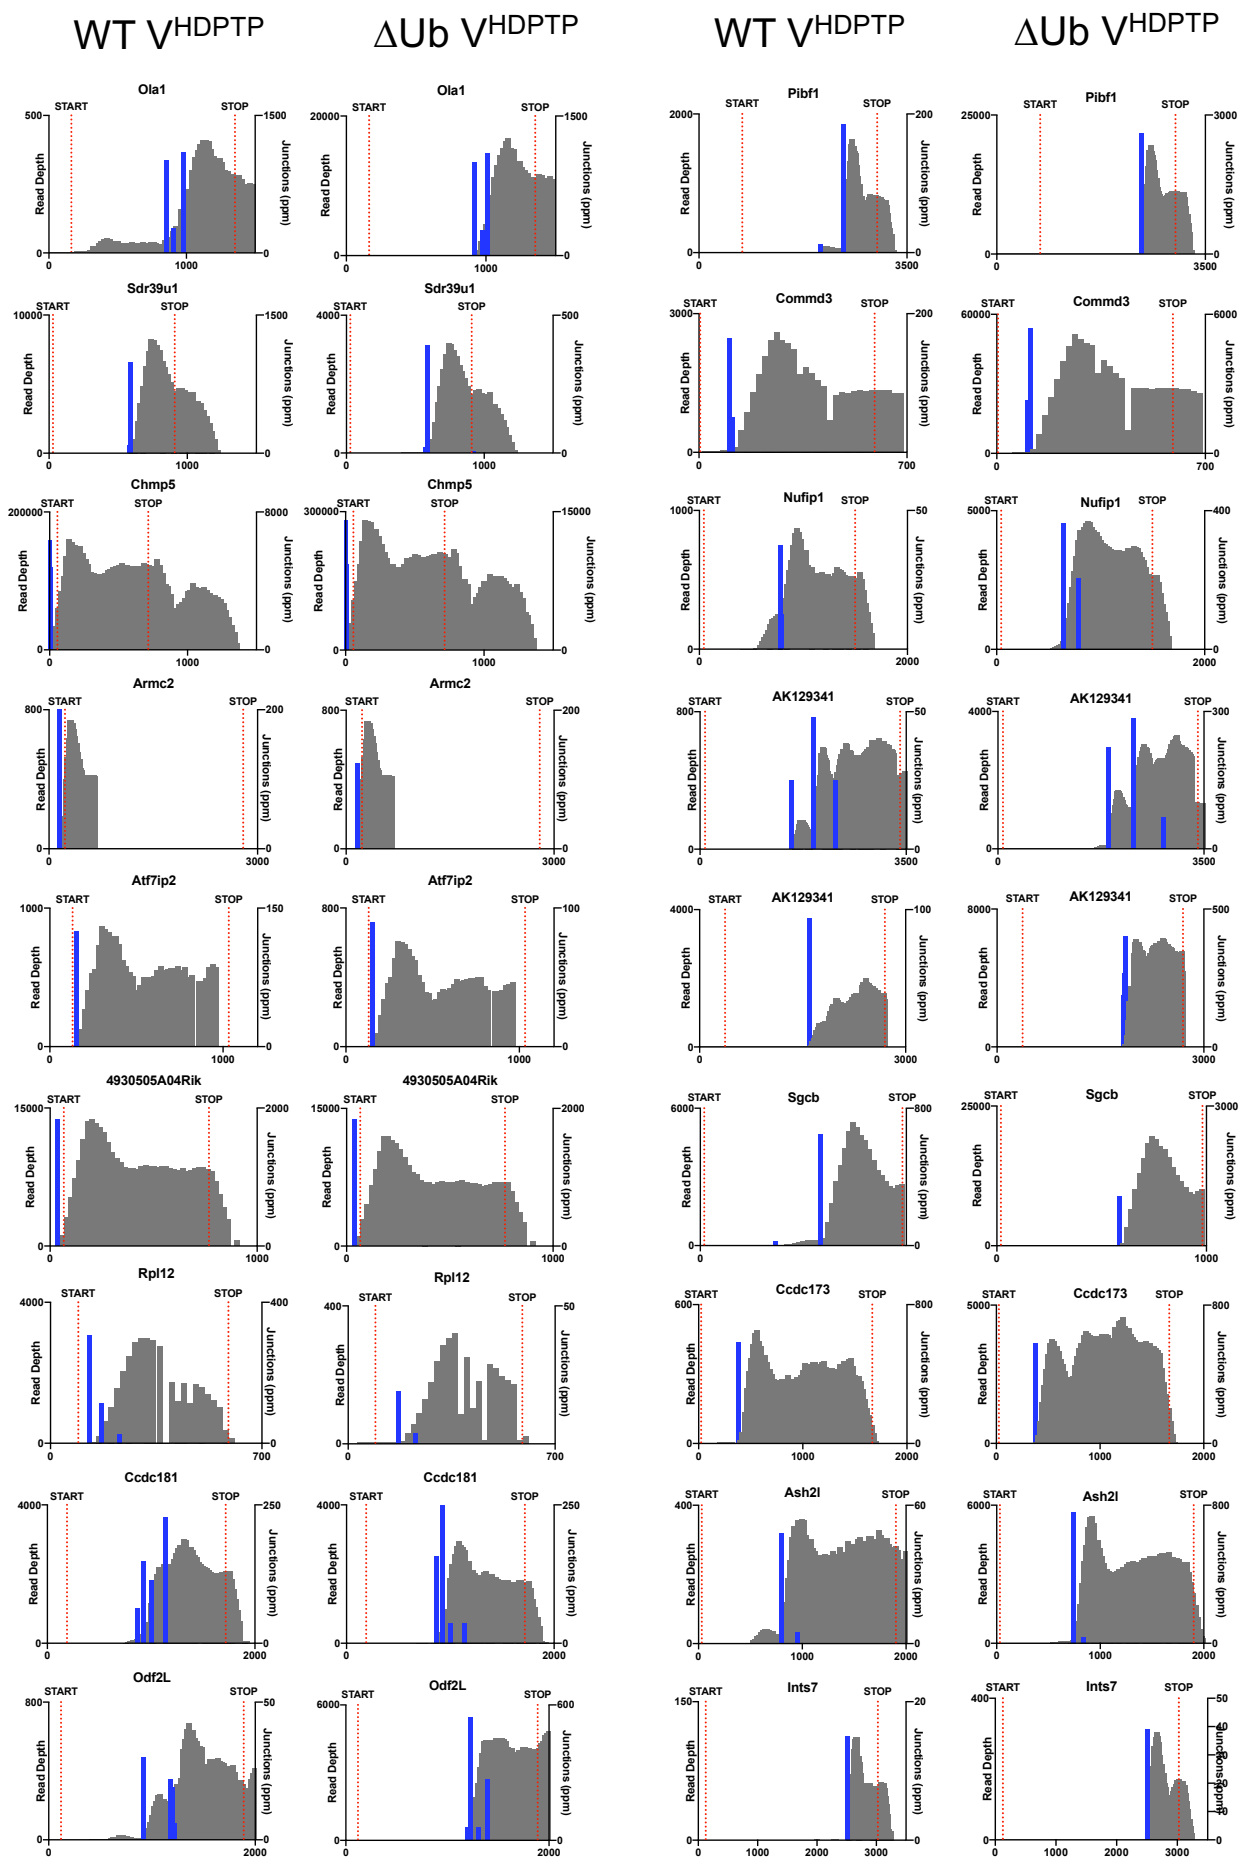

C-2

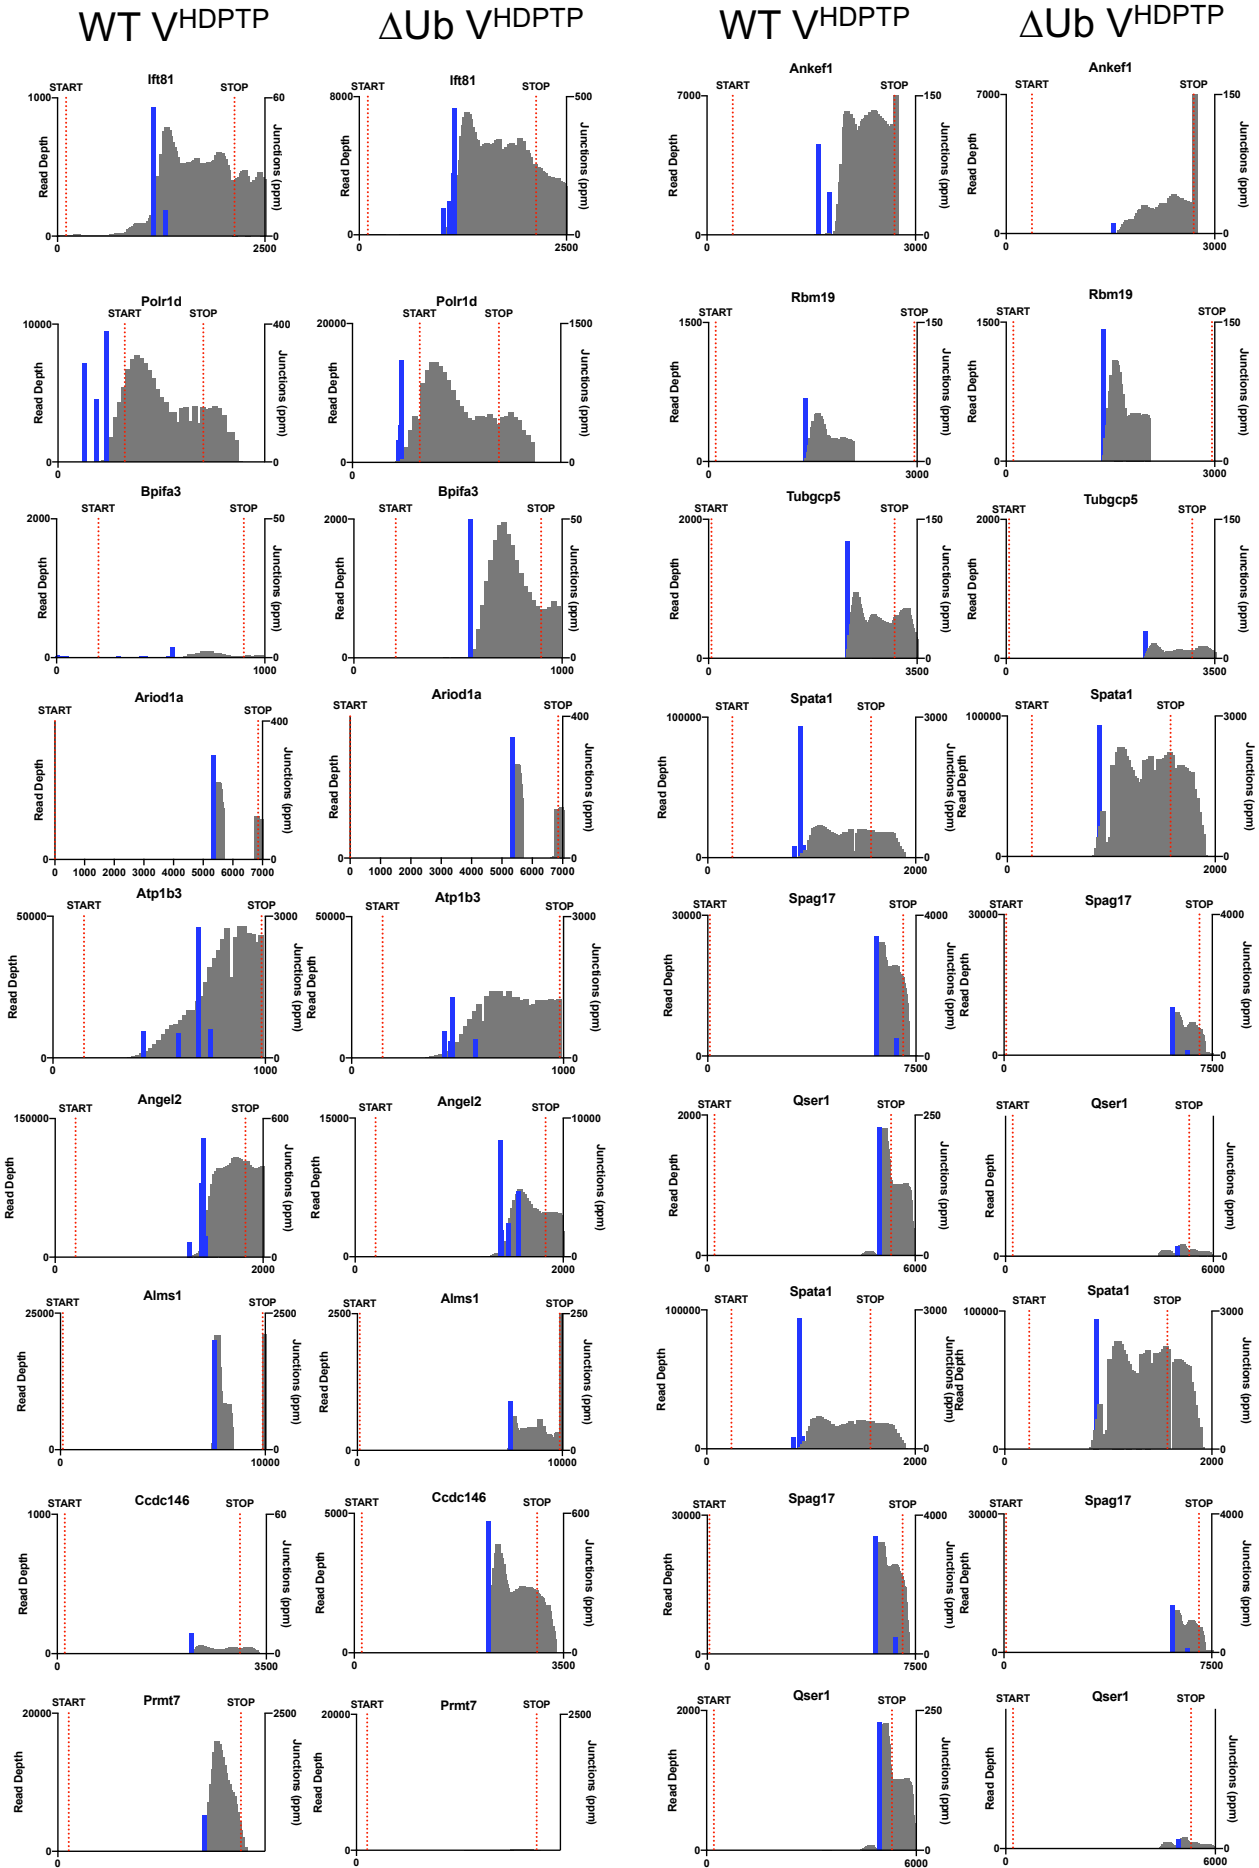

Supplemental Figure 2. Pashkova et al. 2021

C-3

Supplemental Figure 2. Pashkova et al. 2021

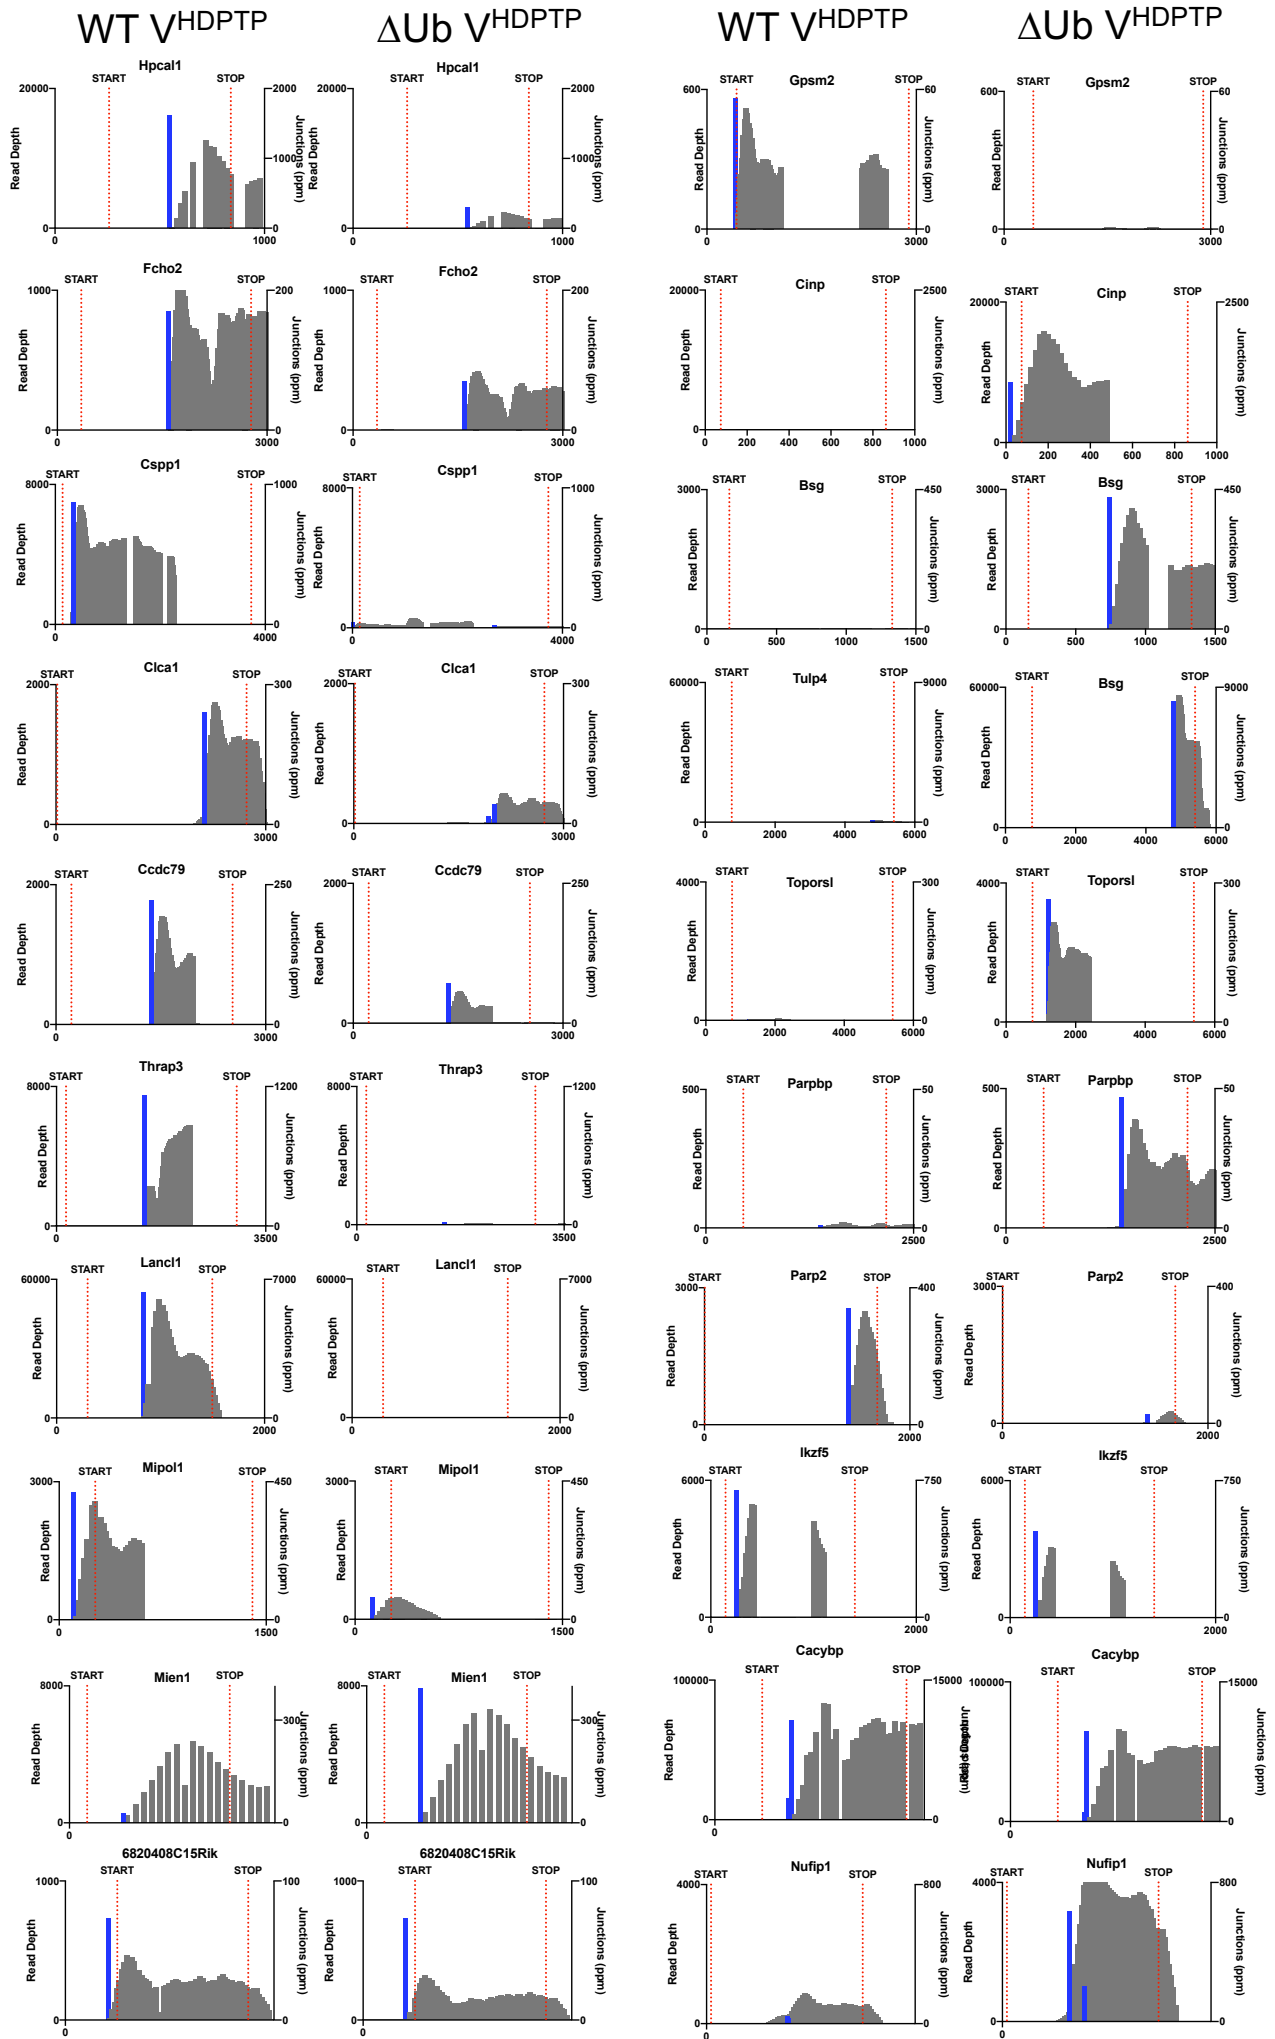

Supplemental Figure 3. Pashkova et al. 2021

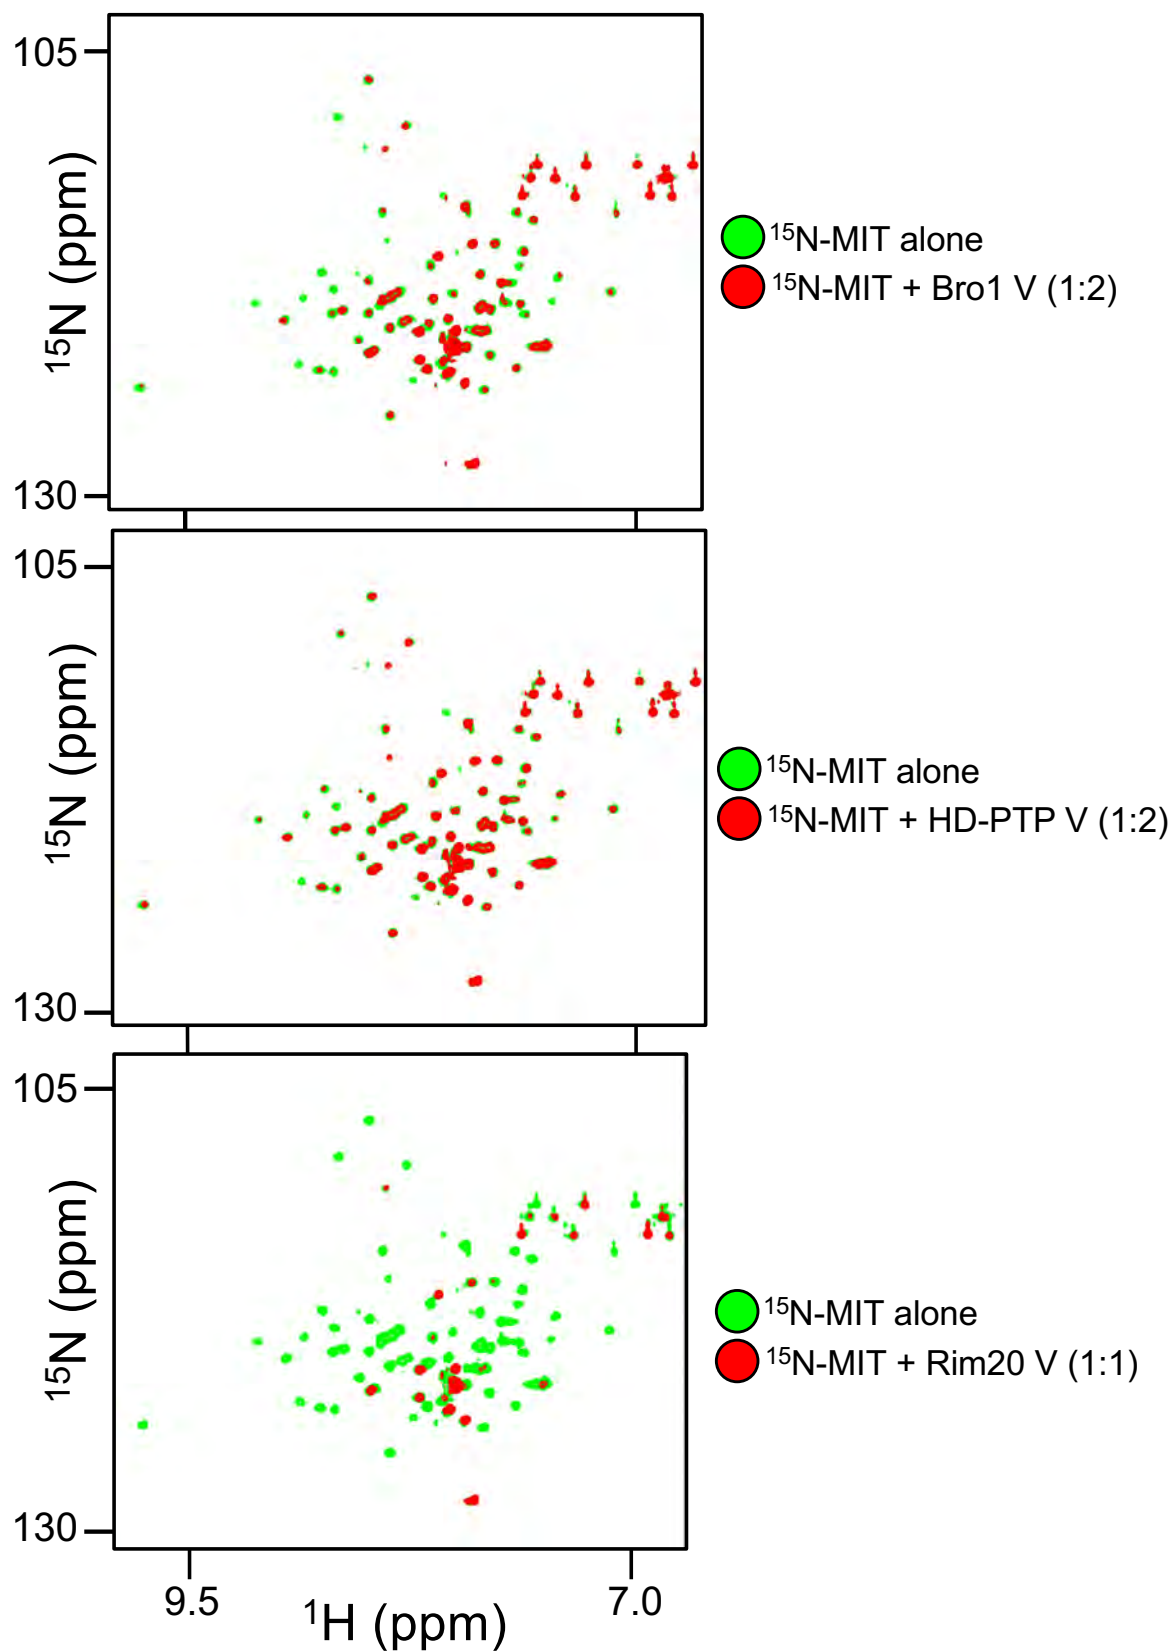

Supplement: mbc-32-ar42-s001.pdf [file mbc-32-ar42-s001.pdf]
